# Supplementary material for: Method for the quantitative evaluation of ecosystem services in coastal regions
Source: PeerJ journal article supplement (doi:10.7717/peerj.6234), 2019-01-14
Supplement: FigS4.pdf [file FigS4.pdf]

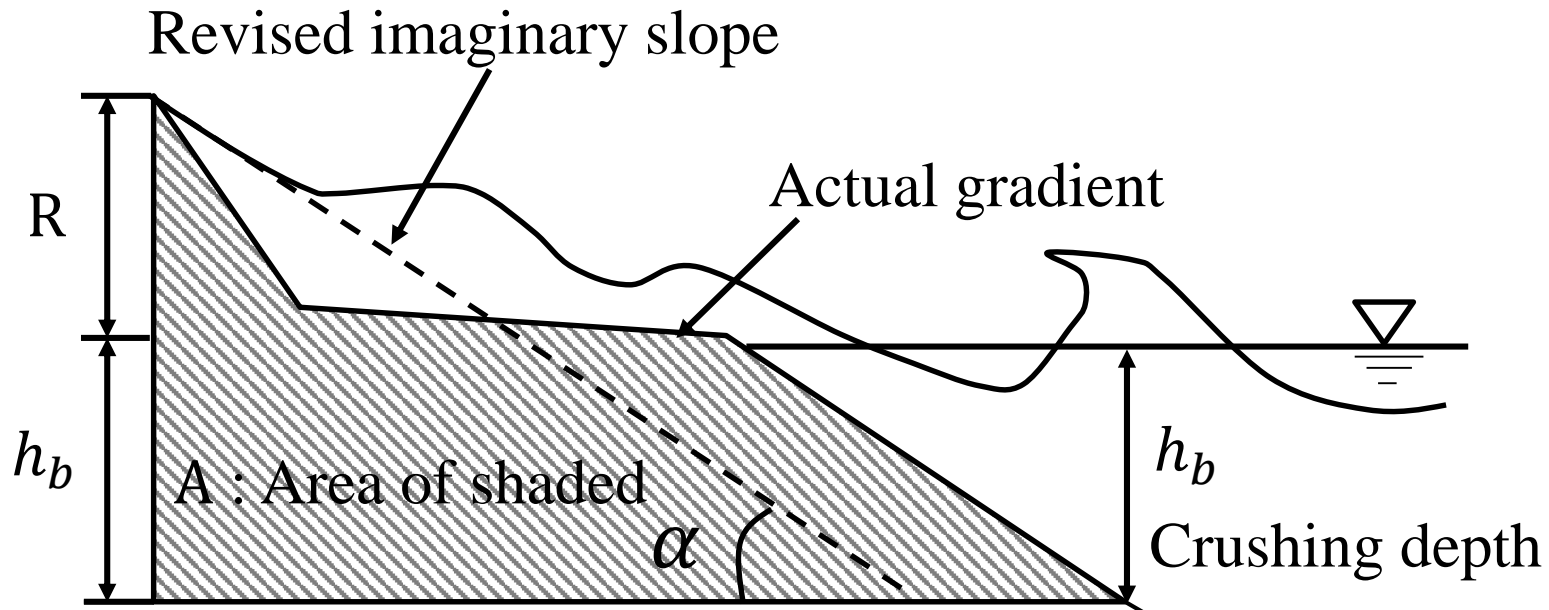

$$\cot \alpha = \frac{2A}{(h_b + R)^2}$$
