# Supplementary material for: Method for the quantitative evaluation of ecosystem services in coastal regions
Source: PeerJ journal article supplement (doi:10.7717/peerj.6234), 2019-01-14
Supplement: FigS5.pdf [file FigS5.pdf]

# Natural System

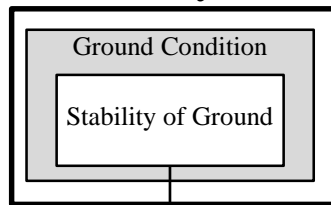

# Social System

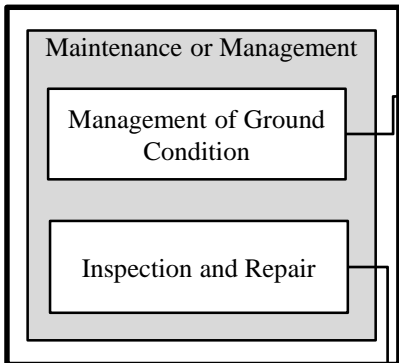

Maintenance and Expansion  
of Intertidal Zone

Resilience

Reduction of Waves:  
Seaside erosion defense in  
normal weather

Maintenance and Expansion  
of Boundary Height

Resilience

Reduction of Flood:  
Hinterland defense in  
weather disturbance

Maintenance and Improvement  
of Coastal Protection

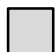

Resilience
