# Supplementary material for: Method for the quantitative evaluation of ecosystem services in coastal regions
Source: PeerJ journal article supplement (doi:10.7717/peerj.6234), 2019-01-14
Supplement: FigS7.pdf [file FigS7.pdf]

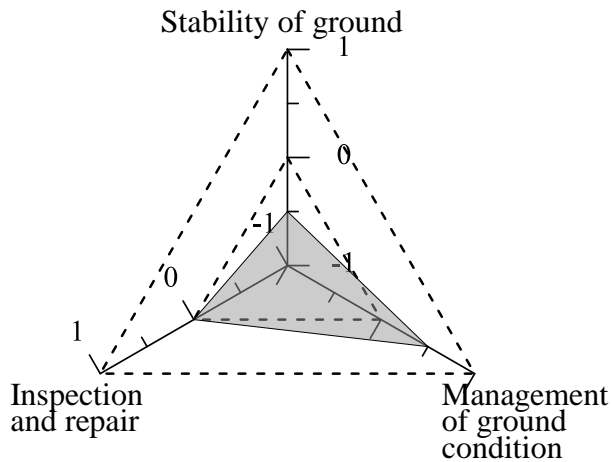

(a)

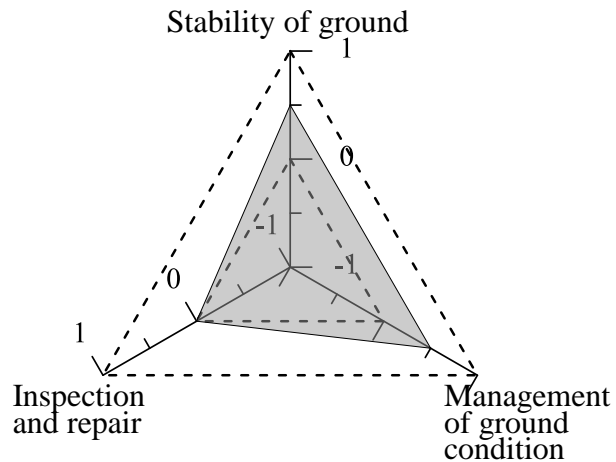

(b)

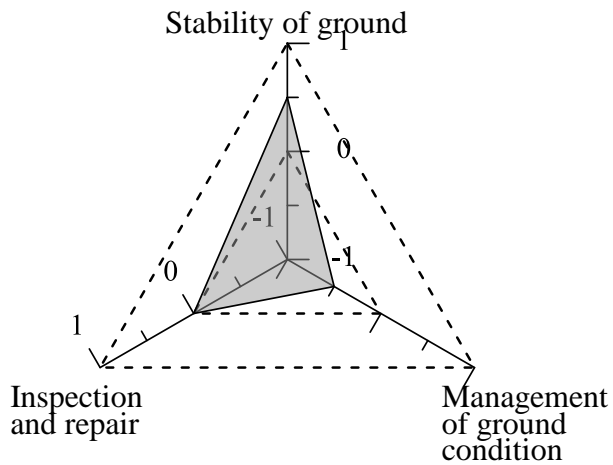

(c)

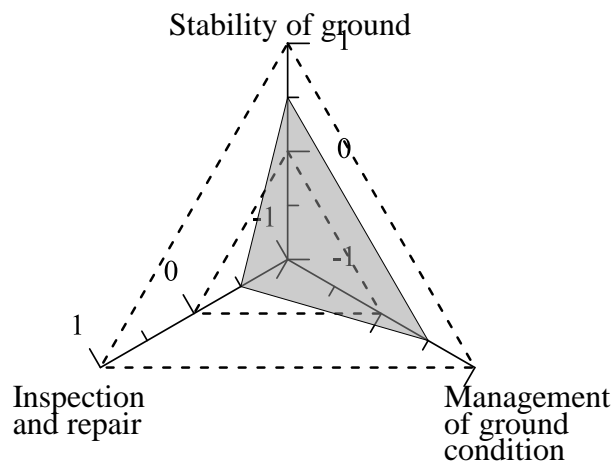

(d)
