# Supplementary material for: Method for the quantitative evaluation of ecosystem services in coastal regions
Source: PeerJ journal article supplement (doi:10.7717/peerj.6234), 2019-01-14
Supplement: FigS8.pdf [file FigS8.pdf]

# Social System

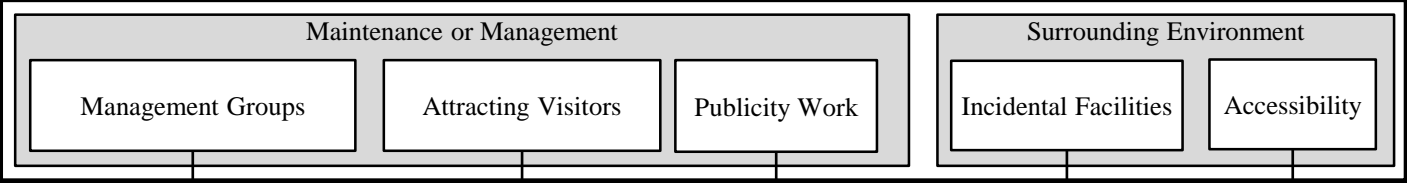

■ Resilience

# Natural System

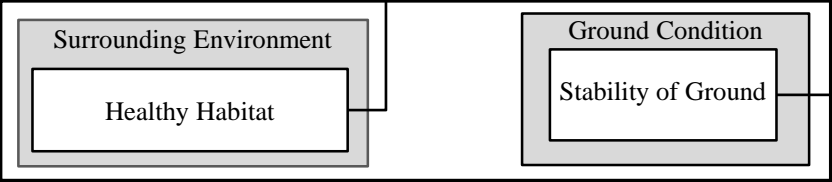

Maintenance of Amenity

Increase Event

Improvement of Convenience

Increase in Number of Visitors by Recreation

Improvement of Recreation

Pressure

Resilience

Maintenance of Intertidal Zone
