# Supplementary material for: Method for the quantitative evaluation of ecosystem services in coastal regions
Source: PeerJ journal article supplement (doi:10.7717/peerj.6234), 2019-01-14

# Social System

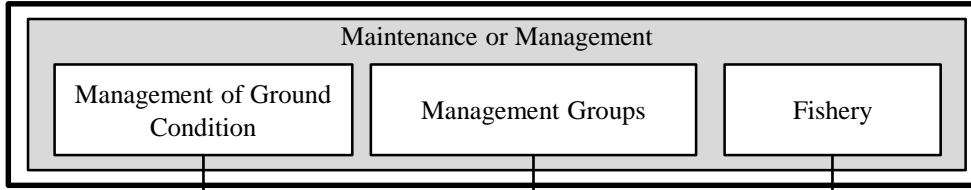

Resilience

Maintenance of Intertidal Zone

Securing Successors

Maintenance of Good Seascape

Resilience

Increase in Number of Religious Festivals and Structures

Maintenance of Historical Designation as Special Sites

# Natural System

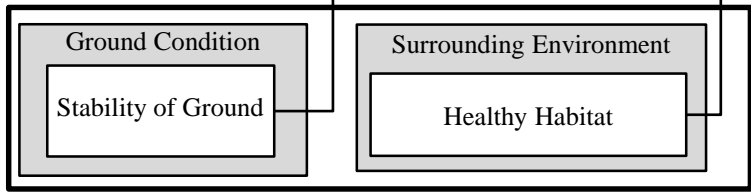

Supplement: FigS12.pdf [file FigS12.pdf]
