# Supplementary material for: Method for the quantitative evaluation of ecosystem services in coastal regions
Source: PeerJ journal article supplement (doi:10.7717/peerj.6234), 2019-01-14
Supplement: FigS15.pdf [file FigS15.pdf]

# Social System

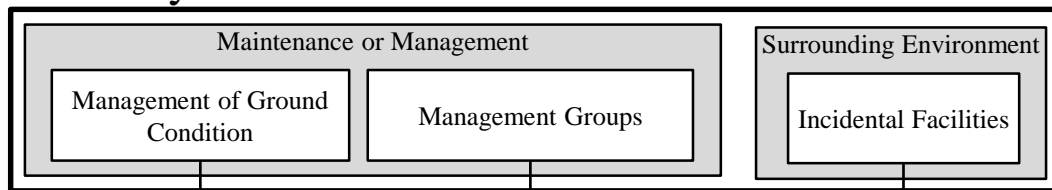

 Resilience

# Natural System

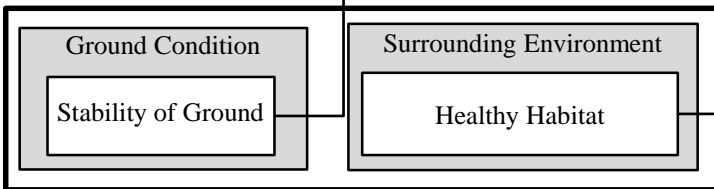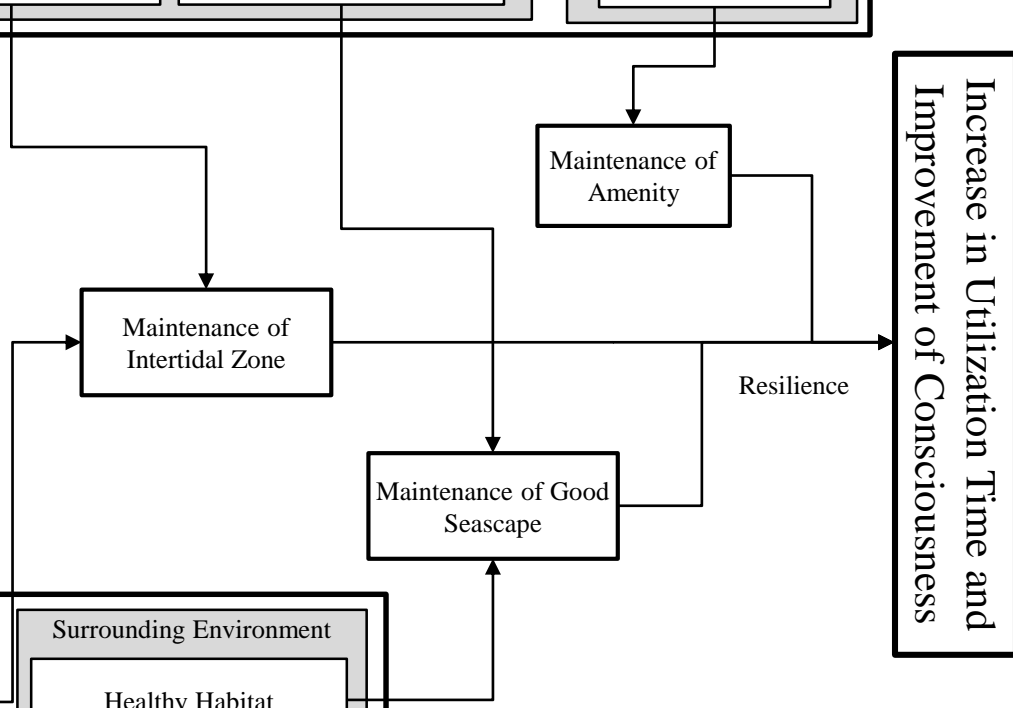

Maintenance of Places for  
Rest and Relaxation
