# Supplementary material for: Method for the quantitative evaluation of ecosystem services in coastal regions
Source: PeerJ journal article supplement (doi:10.7717/peerj.6234), 2019-01-14
Supplement: FigS18.pdf [file FigS18.pdf]

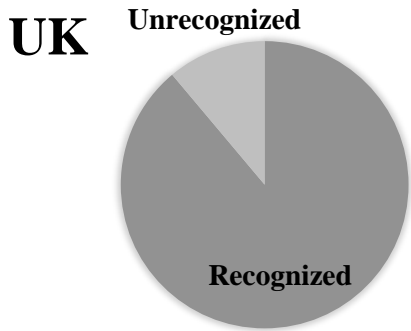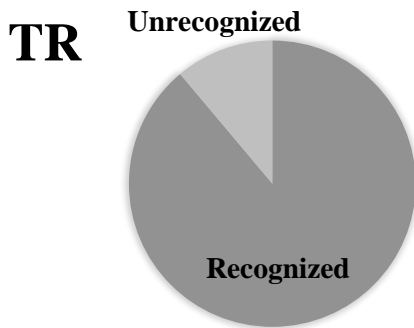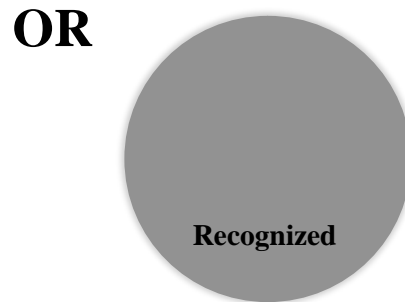

(a) Recognition of the existence of the tidal flat

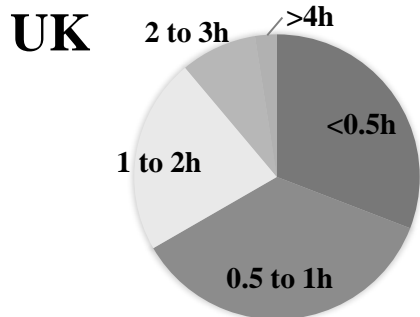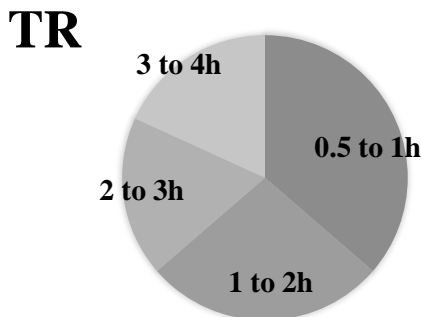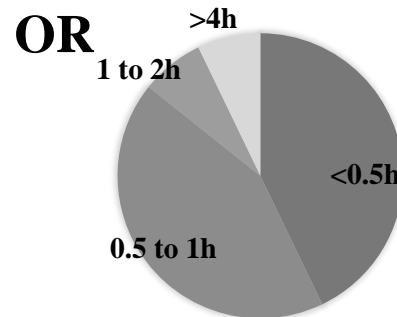

(b) Duration of stay

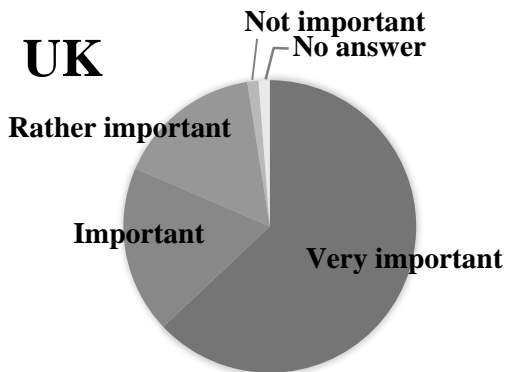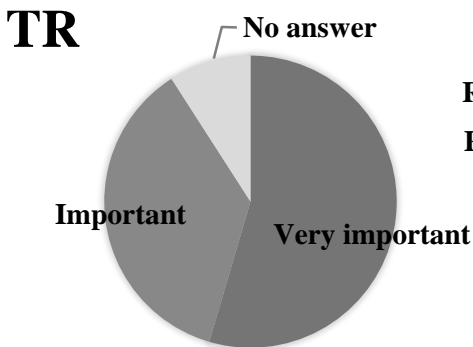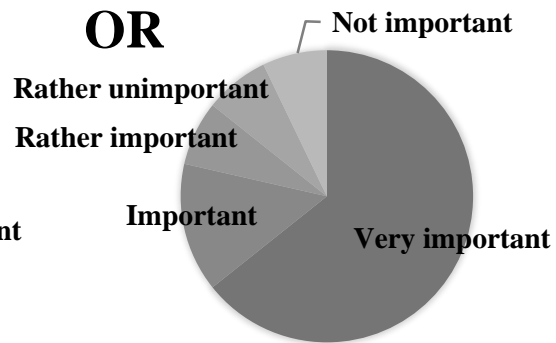

(c) Awareness of the importance of the tidal flat
