# Supplementary material for: Method for the quantitative evaluation of ecosystem services in coastal regions
Source: PeerJ journal article supplement (doi:10.7717/peerj.6234), 2019-01-14

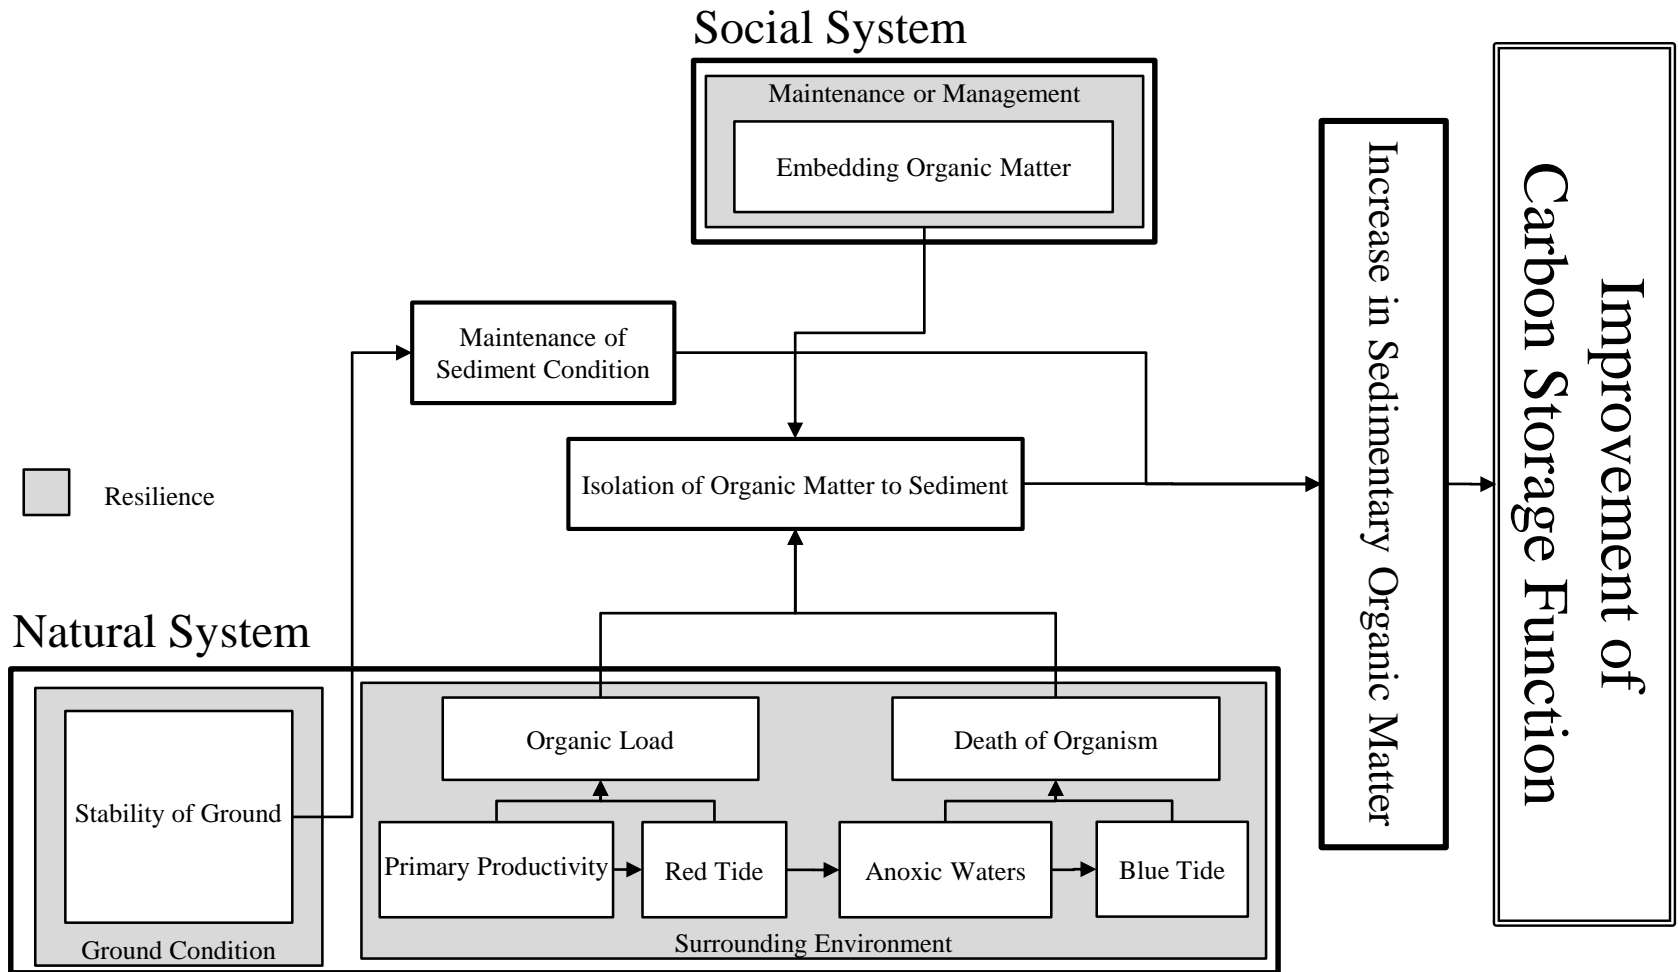

Supplement: FigS26.pdf [file FigS26.pdf]
