# Supplementary material for: Method for the quantitative evaluation of ecosystem services in coastal regions
Source: PeerJ. 2019 Jan 14;6:e6234. doi: 10.7717/peerj.6234 (PMC6336092; doi:10.7717/peerj.6234)
Supplement: Supplemental Information 41 [file peerj-07-6234-s041.docx]

| Year | | 2009 | 2010 | 2011 | 2012 | 2013 |
| --- | --- | --- | --- | --- | --- | --- |
| SN | *X*2.2 | 0.75 | 0.75 | 0.75 | 0.75 | 0.75 |
| *x*2.2 | 0.85 | 0.85 | 0.85 | 0.85 | 0.85 |
| UK | *X*2.2 | 0.84 | 0.78 | 0.78 | 0.88 | 0.86 |
| *x*2.2 | 0.95 | 0.89 | 0.89 | 1.00 | 0.98 |
| TR | *X*2.2 | 0.76 | 0.79 | 0.77 | 0.78 | 0.68 |
| *x*2.2 | 0.87 | 0.90 | 0.88 | 0.89 | 0.78 |
| OR | *X*2.2 | 0.77 | 0.75 | 0.71 | 0.71 | 0.75 |
| *x*2.2 | 0.87 | 0.86 | 0.81 | 0.81 | 0.85 |
