# Supplementary material for: Method for the quantitative evaluation of ecosystem services in coastal regions
Source: PeerJ. 2019 Jan 14;6:e6234. doi: 10.7717/peerj.6234 (PMC6336092; doi:10.7717/peerj.6234)
Supplement: Supplemental Information 59 [file peerj-07-6234-s059.docx]

| Environmental factor | | Condition of pressure or resilience |
| --- | --- | --- |
| Anoxic water | Resilience | DO concentration is >4 mg/L |
| Pressure | DO concentration is <4 mg/L |
| Blue tide | Resilience | No occurrence of blue tide |
| Pressure | Occurrence of blue tide |
| Primary productivity | Resilience | Chl-a concentration is >3 g/L |
| Pressure | Chl-a concentration is <3 g/L |
| Stability of ground | Resilience | No occurrence of erosion, floating sand, subsidence |
| Pressure | Occurrence of them |
| Source of juveniles | Resilience | Existence of a nearby tidal flat |
| Pressure | No nearby tidal flat |
| Management of ground condition | Resilience | Implementation of sand capping, cultivation, removal of *Ulva* sp. |
| Pressure | Absence of them |
