# Supplementary material for: Method for the quantitative evaluation of ecosystem services in coastal regions
Source: PeerJ. 2019 Jan 14;6:e6234. doi: 10.7717/peerj.6234 (PMC6336092; doi:10.7717/peerj.6234)
Supplement: Supplemental Information 78 [file peerj-07-6234-s078.xlsx]

## Sheet: Sheet1
No	Trend score	Food provision	upper limit of 95%	lower limit of 95%	±	Coastal protection	upper limit of 95%	lower limit of 95%	±	Recreation	upper limit of 95%	lower limit of 95%	±	Environmental education	upper limit of 95%	lower limit of 95%	±	Research	upper limit of 95%	lower limit of 95%	±	Historical designation as special sites	upper limit of 95%	lower limit of 95%	±	Places for everyday rest and relaxation	upper limit of 95%	lower limit of 95%	±	Suspended material removal	upper limit of 95%	lower limit of 95%	±	Organic matter decomposition	upper limit of 95%	lower limit of 95%	±	Carbon storage	upper limit of 95%	lower limit of 95%	±	Degree of diversity	upper limit of 95%	lower limit of 95%	±	Rare species	upper limit of 95%	lower limit of 95%	±
1	SN	-0.495348	1.26398	-2.25467	1.75933	0	0	0	0	0	0	0	0	-0.536254	0.665336	-1.73784	1.20159	0.392857	0.91409	-0.128376	0.521233	0	0	0	0	0	0	0	0	0.338468	1.76129	-1.08435	1.42282	-0.0536282	1.01085	-1.11811	1.06448	-0.214464	-0.214464	-0.214464	0	0.225751	0.433654	0.0178486	0.207903	-0.195238	0.606174	-0.996651	0.801412
2	UK	0.0638088	0.244077	-0.116459	0.180268	0.031	0.14472	-0.0827201	0.11372	-0.187782	0.390439	-0.766002	0.57822	0	0	0	0	0.0357143	0.357143	-0.285714	0.321429	0	0	0	0	0	0	0	0	-0.0562042	0.165942	-0.27835	0.222146	0.150331	0.516544	-0.215881	0.366212	-0.0490007	0.218156	-0.316158	0.267157	0.378231	0.522318	0.234145	0.144086	0.235043	1.21562	-0.745538	0.980581
3	TR	0.0350541	0.0797575	-0.00964926	0.0447034	-0.0605	0	0	0.0605	-0.00261118	0	0	0.00261118	0	0	0	0	0.5	0.849927	0.150073	0.349927	0	0	0	0	0	0	0	0	0.0786075	0.217894	-0.0606795	0.139287	0.269346	0.505685	0.0330074	0.236339	-0.190136	0.138735	-0.519007	0.328871	-0.0739661	0.183966	-0.331898	0.257932	0.8	1.66252	-0.0625168	0.862517
4	OR	0.0265958	0.0988533	-0.0456618	0.0722575	-0.02375	0.0496262	-0.0971262	0.0733762	-0.00214397	0.0031473	-0.00743524	0.00529127	0	0	0	0	0.714286	2	-0.571429	1.28571	0	0	0	0	0	0	0	0	-0.0165905	0.139699	-0.172881	0.15629	0.12307	0.323977	-0.0778368	0.200907	0.00626969	0.0164104	-0.00387103	0.0101407	-0.0981524	0.371101	-0.567406	0.469253	0.333333	2.24819	-1.58152	1.91485
No	Likely mear-term future status	Food provision	upper limit of 95%	lower limit of 95%	±	Coastal protection	upper limit of 95%	lower limit of 95%	±	Recreation	upper limit of 95%	lower limit of 95%	±	Environmental education	upper limit of 95%	lower limit of 95%	±	Research	upper limit of 95%	lower limit of 95%	±	Historical designation as special sites	upper limit of 95%	lower limit of 95%	±	Places for everyday rest and relaxation	upper limit of 95%	lower limit of 95%	±	Suspended material removal	upper limit of 95%	lower limit of 95%	±	Organic matter decomposition	upper limit of 95%	lower limit of 95%	±	Carbon storage	upper limit of 95%	lower limit of 95%	±	Degree of diversity	upper limit of 95%	lower limit of 95%	±	Rare species	upper limit of 95%	lower limit of 95%	±
1	SN	0.0922553	0.27588	-0.0913692	0.183624	0.812	0.812	0.812	0	0	0	0	0	0.297651	0.706264	-0.110962	0.408613	0.721837	0.921394	0.522279	0.199558	0	0	0	0	0	0	0	0	1.17757	2.12844	0.22671	0.950865	0.499022	0.886769	0.111274	0.387748	0.560581	0.560581	0.560581	0	0.904808	1.01978	0.789839	0.114969	0.0678492	0.112595	0.0231037	0.0447455
2	UK	0.0568329	0.062691	0.0509747	0.00585814	1.02335	1.0923	0.954393	0.0689542	0.784251	1.09051	0.477989	0.306261	0.702136	0.702136	0.702136	0	0.146276	0.177041	0.11551	0.0307653	0	0	0	0	1.099	1.099	1.099	0	0.220068	0.248943	0.191192	0.0288754	0.134004	0.159839	0.10817	0.0258342	0.163284	0.193346	0.133223	0.0300613	1.15704	1.24424	1.06984	0.0872019	0.131664	0.204663	0.0586655	0.0729988
3	TR	0.0401164	0.0413025	0.0389302	0.00118618	0.833295	0.8685	0.8685	0.0352046	0.00254712	0.00255192	0.00255192	4.8043e-06	0	0	0	0	0.858214	1.00893	0.707496	0.150719	0.5	0.5	0.5	0	0.0311916	0.0311916	0.0311916	0	0.149701	0.162475	0.136926	0.0127745	0.441633	0.498887	0.384378	0.0572544	0.7625	0.945694	0.579305	0.183194	0.869133	1.02272	0.715547	0.153586	1.47664	2.02242	0.930857	0.545781
4	OR	0.0594471	0.0620121	0.0568822	0.00256495	0.960636	1.00609	0.915186	0.0454503	0.0033262	0.00333633	0.00331606	1.01343e-05	0.42568	0.42568	0.42568	0	0.844898	1.33714	0.352653	0.492245	0.75	0.75	0.75	0	0.0298285	0.0298285	0.0298285	0	0.0936485	0.10256	0.0847365	0.00891199	0.193456	0.215267	0.171645	0.021811	0.138787	0.139699	0.137875	0.000911844	0.787209	1.03063	0.543785	0.243424	1.30583	2.58879	0.022881	1.28295
No	Goal score	Food provision	upper limit of 95%	lower limit of 95%	±	Coastal protection	upper limit of 95%	lower limit of 95%	±	Recreation	upper limit of 95%	lower limit of 95%	±	Environmental education	upper limit of 95%	lower limit of 95%	±	Research	upper limit of 95%	lower limit of 95%	±	Historical designation as special sites	upper limit of 95%	lower limit of 95%	±	Places for everyday rest and relaxation	upper limit of 95%	lower limit of 95%	±	Suspended material removal	upper limit of 95%	lower limit of 95%	±	Organic matter decomposition	upper limit of 95%	lower limit of 95%	±	Carbon storage	upper limit of 95%	lower limit of 95%	±	Degree of diversity	upper limit of 95%	lower limit of 95%	±	Rare species	upper limit of 95%	lower limit of 95%	±
1	SN	12.4017	21.583	3.2205	9.18122	81.2	81.2	81.2	0	0	0	0	0	40.2602	60.6909	19.8295	20.4307	64.6633	74.6412	54.6854	9.97789	0	0	0	0	0	0	0	0	100	156.295	61.2084	56.2949	52.1347	71.5221	32.7473	19.3874	58.6678	58.6678	58.6678	0	86.5086	92.2571	80.7602	5.74844	7.55913	9.7964	5.32185	2.23728
2	UK	5.26678	5.55969	4.97387	0.292907	96.4173	99.8651	92.9696	3.44771	78.7396	94.0526	63.4265	15.3131	66.8289	66.8289	66.8289	0	14.4566	15.9949	12.9184	1.53827	0	0	0	0	100	100	100	0	20.7037	22.1475	19.2599	1.44377	11.9647	13.2564	10.673	1.29171	16.5614	18.0645	15.0584	1.50306	100	107.377	98.6564	7.37658	12.1388	15.7887	8.48883	3.64994
3	TR	3.986	4.0453	3.92669	0.0593088	85.0898	86.85	86.85	1.76023	0.264662	0.264902	0.264902	0.000240215	0	0	0	0	75.0536	82.5895	67.5176	7.53593	50	50	50	0	3.17238	3.17238	3.17238	0	14.3293	14.968	13.6906	0.638725	40.1604	43.0231	37.2977	2.86272	79.6951	88.8548	70.5354	9.15972	87.8935	95.5728	80.2141	7.67932	100	148.343	93.7651	48.3432
4	OR	5.62141	5.74966	5.49316	0.128247	94.2568	96.5293	91.9843	2.27252	0.309241	0.309748	0.308734	0.000506713	39.4109	39.4109	39.4109	0	70.8163	95.4286	46.2041	24.6122	75	75	75	0	2.77162	2.77162	2.77162	0	8.93781	9.38341	8.49221	0.4456	17.7745	18.8651	16.684	1.09055	13.6497	13.6953	13.6041	0.0455922	78.0729	90.2441	65.9017	12.1712	100	179.439	51.1441	79.4393
