# Supplementary material for: Method for the quantitative evaluation of ecosystem services in coastal regions
Source: PeerJ. 2019 Jan 14;6:e6234. doi: 10.7717/peerj.6234 (PMC6336092; doi:10.7717/peerj.6234)
Supplement: Supplemental Information 80 [file peerj-07-6234-s080.xlsx]

## Sheet: Sheet1
Station	Distance from shoreline (m)	Wave enegy (N/m)
SN	0	20.0109
SN	5	88.2282
UK	0	35.1681
UK	9.6	48.0092
UK	19.6	146.36
TR	0	18.8898
TR	50	26.4294
TR	100	55.5049
TR	136.741	216.641
OR	0	21.0299
OR	100	19.6457
OR	200	19.6457
OR	300	31.6518
OR	400	35.0975
OR	500	72.0611
OR	600	146.306
OR	640	466.678
