# Supplementary material for: Method for the quantitative evaluation of ecosystem services in coastal regions
Source: PeerJ. 2019 Jan 14;6:e6234. doi: 10.7717/peerj.6234 (PMC6336092; doi:10.7717/peerj.6234)
Supplement: Supplemental Information 83 [file peerj-07-6234-s083.xlsx]

## Sheet: Sheet1
	Diversity of creatures	Management groups	Attracting visitors	Publicity work	Protection of species	Incidental facilities	Accessibility	Stability of ground	Healthy habitat
SN	0.52	0.5	-0.5	-0.5	-0.5	0.5	-0.5	-0.5	-0.5
UK	0.41	0.5	0.5	0.5	0	0.5	0.5	0.5	-0.5
TR	0.73	-0.5	-0.5	-0.5	-0.5	-0.5	-0.5	0.5	0.5
OR	0.75	0.5	0.5	0.5	0.5	0.5	0.5	0.5	0.5
