# Supplementary material for: Method for the quantitative evaluation of ecosystem services in coastal regions
Source: PeerJ. 2019 Jan 14;6:e6234. doi: 10.7717/peerj.6234 (PMC6336092; doi:10.7717/peerj.6234)
Supplement: Supplemental Information 88 [file peerj-07-6234-s088.xlsx]

## Sheet: Sheet1
	No occurrence of anoxic water	Primary productivity	Stability of ground	No occurrence of blue tide	Source of juveniles	Management of ground condition
SN	-1	0.160039	-0.5	-0.5	0.5	0.5
UK	0.98	0.147125	0.5	0.5	0.5	0.5
TR	-0.602	0.34654	0.5	0.5	0.5	-0.5
OR	-0.52	0.5467	0.5	0.5	0.5	0.5
