# Supplementary material for: Method for the quantitative evaluation of ecosystem services in coastal regions
Source: PeerJ. 2019 Jan 14;6:e6234. doi: 10.7717/peerj.6234 (PMC6336092; doi:10.7717/peerj.6234)
Supplement: Supplemental Information 91 [file peerj-07-6234-s091.xlsx]

## Sheet: Sheet1
	Organic load	Stability of ground	Death of creatures	Organic isolation
SN	0.35029	-0.5	0.5	0.5
UK	0.336787	0.5	-0.5	-0.5
TR	0.544379	0.5	-0.5	0
OR	0.752825	0.5	-0.5	-0.5
